# Supplementary material for: Slx5/Slx8‐dependent ubiquitin hotspots on chromatin contribute to stress tolerance
Source: PubMed Central journal article supplement (PMC6545562; doi:10.15252/embj.2018100368), 2019-04-23

Source data for Figure 4B.

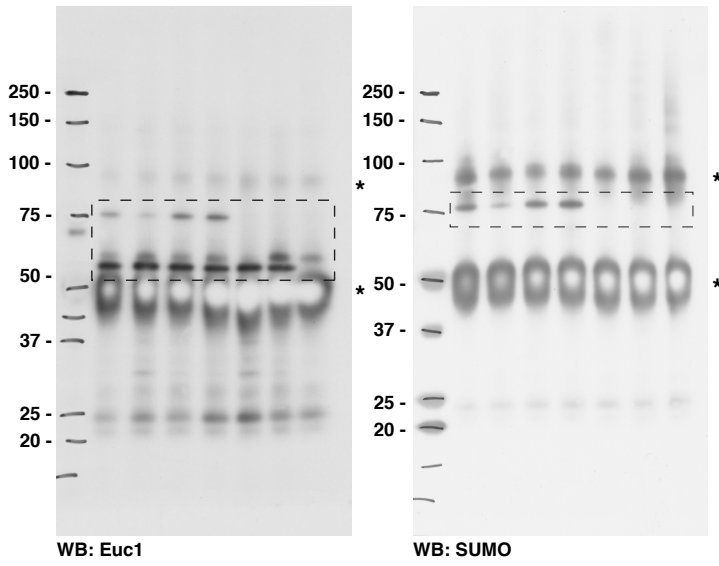

Source data for Figure 4C.

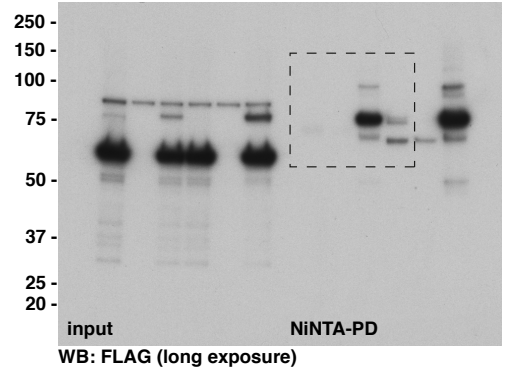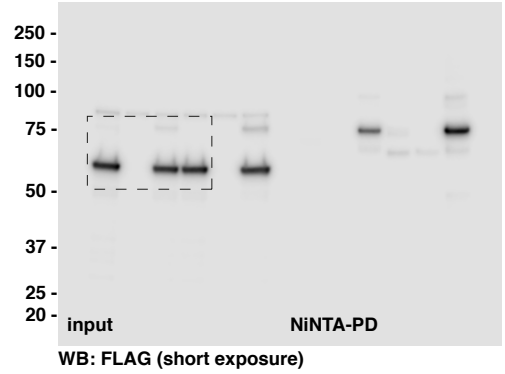

Source data for Figure 4E.

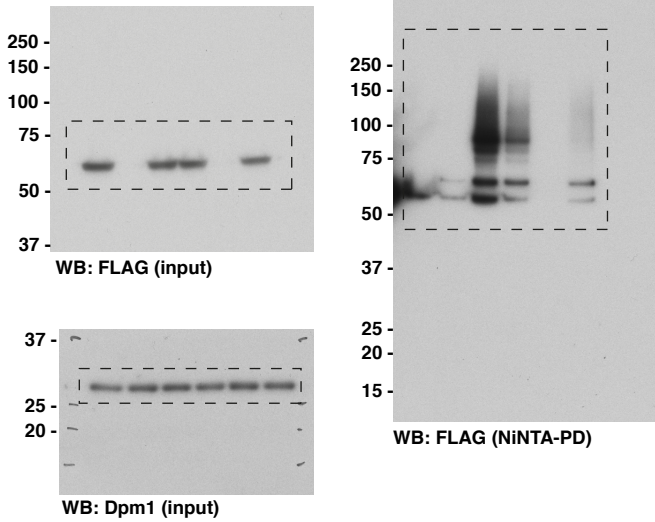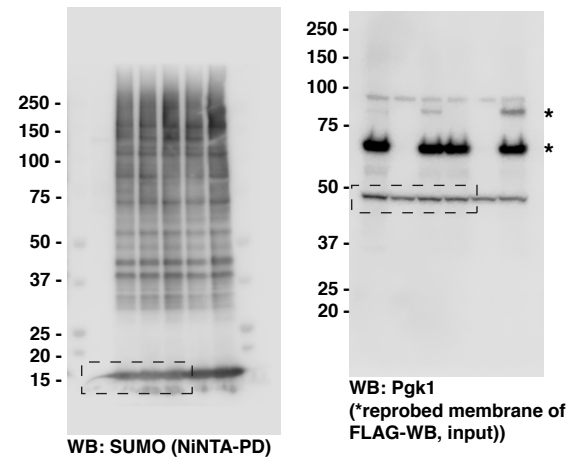

Supplement: EMBJ-38-e100368-s012.pdf [file EMBJ-38-e100368-s012.pdf]
